# Supplementary material
Source: Research Square preprint supplement (doi:10.21203/rs.3.rs-9378849/v1)
Supplement: Supplementary file 1 [file c90cb27f58644abc66c1c3bb.docx]

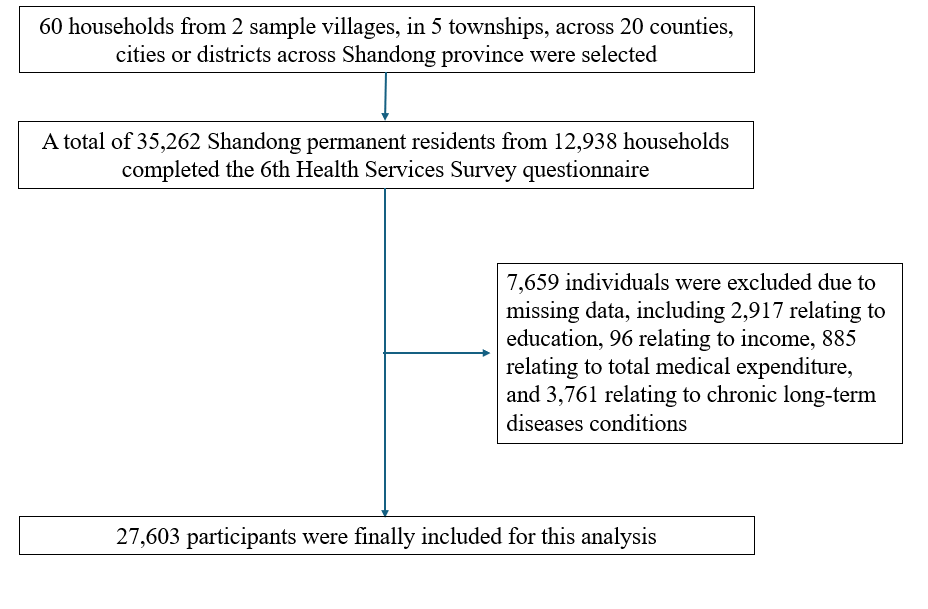


Figure 1. Study sample selection process

Table 1. Socioeconomic and environmental indicators for prefecture-level cities in Shandong province, 20241, 2

|  | Population (10,000 persons) | PM2.5 concentration (µg/m³) | Green area (ha) | GDP (100 million CNY) |
| --- | --- | --- | --- | --- |
| Jinan | 951.47 | 36 | 37,281 | 13,005 |
| Qingdao | 1044.25 | 26 | 49,548 | 15,973 |
| Zibo | 463.67 | 40 | 22,053 | 4,677 |
| Zaozhuang | 380.50 | 40 | 9,857 | 2,276 |
| Dongying | 220.83 | 33 | 12,282 | 4,081 |
| Yantai | 703.52 | 25 | 18,568 | 10,266 |
| Weifang | 931.99 | 35 | 13,678 | 7,782 |
| Jining | 818.73 | 39 | 11,684 | 5,642 |
| Taian | 529.15 | 38 | 7,970 | 3,448 |
| Weihai | 291.46 | 20 | 10,753 | 3,565 |
| Rizhao | 292.88 | 30 | 6,102 | 2,455 |
| Linyi | 1084.84 | 38 | 17,565 | 6,270 |
| Dezhou | 548.28 | 42 | 9,342 | 3,886 |
| Liaocheng | 580.34 | 42 | 12,681 | 3,044 |
| Binzhou | 387.44 | 38 | 8,565 | 3,241 |
| Heze | 850.82 | 44 | 10,343 | 4,587 |

Table 2. STROBE reporting checklist for cross-sectional studies

|  | Item No | Recommendation | Reported on page |
| --- | --- | --- | --- |
| **Title and abstract** | 1 | (*a*) Indicate the study’s design with a commonly used term in the title or the abstract |  |
| (*b*) Provide in the abstract an informative and balanced summary of what was done and what was found |  |
| Introduction | | |  |
| Background/rationale | 2 | Explain the scientific background and rationale for the investigation being reported |  |
| Objectives | 3 | State specific objectives, including any prespecified hypotheses |  |
| Methods | | |  |
| Study design | 4 | Present key elements of study design early in the paper |  |
| Setting | 5 | Describe the setting, locations, and relevant dates, including periods of recruitment, exposure, follow-up, and data collection |  |
| Participants | 6 | (*a*) Give the eligibility criteria, and the sources and methods of selection of participants |  |
| Variables | 7 | Clearly define all outcomes, exposures, predictors, potential confounders, and effect modifiers. Give diagnostic criteria, if applicable |  |
| Data sources/ measurement | 8* | For each variable of interest, give sources of data and details of methods of assessment (measurement). Describe comparability of assessment methods if there is more than one group |  |
| Bias | 9 | Describe any efforts to address potential sources of bias |  |
| Study size | 10 | Explain how the study size was arrived at |  |
| Quantitative variables | 11 | Explain how quantitative variables were handled in the analyses. If applicable, describe which groupings were chosen and why |  |
| Statistical methods | 12 | (*a*) Describe all statistical methods, including those used to control for confounding |  |
| (*b*) Describe any methods used to examine subgroups and interactions |  |
| (*c*) Explain how missing data were addressed |  |
| (*d*) If applicable, describe analytical methods taking account of sampling strategy |  |
| (*e*) Describe any sensitivity analyses |  |
| Results | | |  |
| Participants | 13* | (a) Report numbers of individuals at each stage of study—eg numbers potentially eligible, examined for eligibility, confirmed eligible, included in the study, completing follow-up, and analysed |  |
| (b) Give reasons for non-participation at each stage |  |
| (c) Consider use of a flow diagram |  |
| Descriptive data | 14* | (a) Give characteristics of study participants (eg demographic, clinical, social) and information on exposures and potential confounders |  |
| (b) Indicate number of participants with missing data for each variable of interest |  |
| Outcome data | 15* | Report numbers of outcome events or summary measures |  |
| Main results | 16 | (*a*) Give unadjusted estimates and, if applicable, confounder-adjusted estimates and their precision (eg, 95% confidence interval). Make clear which confounders were adjusted for and why they were included |  |
| (*b*) Report category boundaries when continuous variables were categorized |  |
| (*c*) If relevant, consider translating estimates of relative risk into absolute risk for a meaningful time period |  |
| Other analyses | 17 | Report other analyses done—eg analyses of subgroups and interactions, and sensitivity analyses |  |
| Discussion | | |  |
| Key results | 18 | Summarise key results with reference to study objectives |  |
| Limitations | 19 | Discuss limitations of the study, taking into account sources of potential bias or imprecision. Discuss both direction and magnitude of any potential bias |  |
| Interpretation | 20 | Give a cautious overall interpretation of results considering objectives, limitations, multiplicity of analyses, results from similar studies, and other relevant evidence |  |
| Generalisability | 21 | Discuss the generalisability (external validity) of the study results |  |
| Other information | | |  |
| Funding | 22 | Give the source of funding and the role of the funders for the present study and, if applicable, for the original study on which the present article is based |  |

Table 3. Disease classification list for the Health Services Survey in Shandong province

| 1. Infectious disease |
| --- |
| Hepatitis B |
| 1. Cancer and tumors |
| Nasopharyngeal carcinoma |
| Esophageal cancer |
| Gastric cancer |
| Colorectal cancer |
| Rectal and anal cancer |
| Liver cancer |
| Pancreatic cancer |
| Tracheal, bronchial, and lung cancer |
| Breast cancer |
| Cervical cancer |
| Leukemia |
| Other types of cancer |
| Benign uterine tumor |
| Benign brain tumor |
| Other benign tumors |
| Carcinoma in situ |
| 1. Endocrine, nutritional, metabolic diseases and immune disorders |
| Hyperthyroidism |
| Diabetes |
| Malnutrition |
| Rickets |
| Obesity and other nutritional disorders |
| Other endocrine, nutritional, metabolic, and immune disorders |
| 1. Blood and hematopoietic organ diseases |
| Anemia |
| Other blood and hematopoietic organ diseases |
| 1. Psychiatric disorders |
| Senile and pre-senile organic mental disorders |
| Schizophrenia |
| Depression |
| Other mental disorders |
| 1. Neurological diseases |
| Meningitis |
| Epilepsy |
| Parkinson's disease |
| Other neurological disorders |
| 1. Eye and adnexal diseases |
| Glaucoma |
| Cataract |
| Corneal diseases |
| Other eye and adnexal diseases |
| Ear and mastoid diseases |
| Otitis media and mastoiditis |
| Other ear and mastoid diseases |
| 1. Circulatory system diseases |
| Chronic rheumatic heart disease |
| Other ischemic heart diseases |
| Pulmonary heart disease |
| Other types of heart disease |
| Hypertension |
| Cerebrovascular diseases |
| Varicose veins |
| Other circulatory system diseases |
| 1. Respiratory system diseases |
| Pneumonia |
| Chronic pharyngitis and laryngitis |
| Emphysema |
| Other chronic obstructive pulmonary disease (COPD), including chronic bronchitis, etc. |
| Asthma |
| Other chronic respiratory system diseases |
| 1. Digestive system diseases |
| Dental diseases |
| Other oral, salivary gland, and jaw diseases |
| Chronic gastroenteritis |
| Peptic ulcer |
| Abdominal hernia |
| Intestinal obstruction |
| Chronic liver disease |
| Liver cirrhosis |
| Cholelithiasis |
| Cholecystitis |
| Other Chronic digestive system disorders |
| 1. Genitourinary disorders |
| Nephropathy |
| Nephritis |
| Pyelonephritis |
| Urinary tract stones |
| Other Chronic urogenital disorders |
| Benign prostatic hyperplasia or inflammation |
| Other chronic male genital disorders |
| Breast disease |
| Salpingitis |
| Oophoritis |
| Uterine prolapse |
| Other chronic female genital disorders |
| 1. Skin and subcutaneous tissue disorders |
| Furuncle |
| Boil |
| Dermatitis |
| Other chronic skin and subcutaneous tissue disorders |
| 1. Musculoskeletal and connective tissue disorders |
| Rheumatoid arthritis |
| Intervertebral disc disease |
| Osteomyelitis |
| Other chronic musculoskeletal disorders |
| 1. Congenital disorders |
| Congenital heart disease |
| Other congenital abnormalities |

Table 4. Sensitivity analysis of household medical expenditure across NDVI 2-5km buffers

| Variables | β (95% CI) | P values |
| --- | --- | --- |
| NDVI (base = ) |  |  |
| Q2 | -0.17 (-0.24, -0.11) | <0.001 |
| Q3 | -0.22 (-0.30, -0.15) | <0.001 |
| Q4 | -0.17 (-0.26, -0.08) | <0.001 |
| NDVI (base = ) |  |  |
| Q2 | -0.04 (-0.08, -0.01) | <0.001 |
| Q3 | -0.08 (-0.14, -0.02) | <0.01 |
| Q4 | -0.02 (-0.09, 0.06) | 0.04 |
| NDVI (base = ) |  |  |
| Q2 | -0.03 (-0.06, 0.01) | <0.01 |
| Q3 | -0.07 (-0.13, -0.01) | 0.05 |
| Q4 | 0.07 (-0.01, 0.14) | 0.26 |
| NDVI (base = ) |  |  |
| Q2 | -0.02 (-0.05, 0.02) | 0.43 |
| Q3 | 0.01 (-0.05, 0.06) | 0.91 |
| Q4 | -0.02 (-0.09, 0.05) | 0.56 |

Table 5. Sensitivity analysis of household medical expenditure by PM2.5 using 4km, 5km, and 10km buffers

| Variables | β (95% CI) | P values |
| --- | --- | --- |
| PM2.5 (base = ) |  |  |
| Q2 | 0.06 (0.01, 0.11) | 0.01 |
| Q3 | 0.05 (0.01, 0.10) | 0.05 |
| Q4 | 0.28 (0.22, 0.33) | <0.001 |
| PM2.5 (base = ) |  |  |
| Q2 | 0.12 (0.07, 0.17) | <0.001 |
| Q3 | 0.06 (0.01, 0.11) | 0.04 |
| Q4 | 0.31 (0.25, 0.36) | <0.001 |
| PM2.5 (base = ) |  |  |
| Q2 | 0.12 (0.07, 0.17) | <0.001 |
| Q3 | 0.04 (-0.12, 0.10) | 0.14 |
| Q4 | 0.30 (0.24, 0.35) | <0.001 |


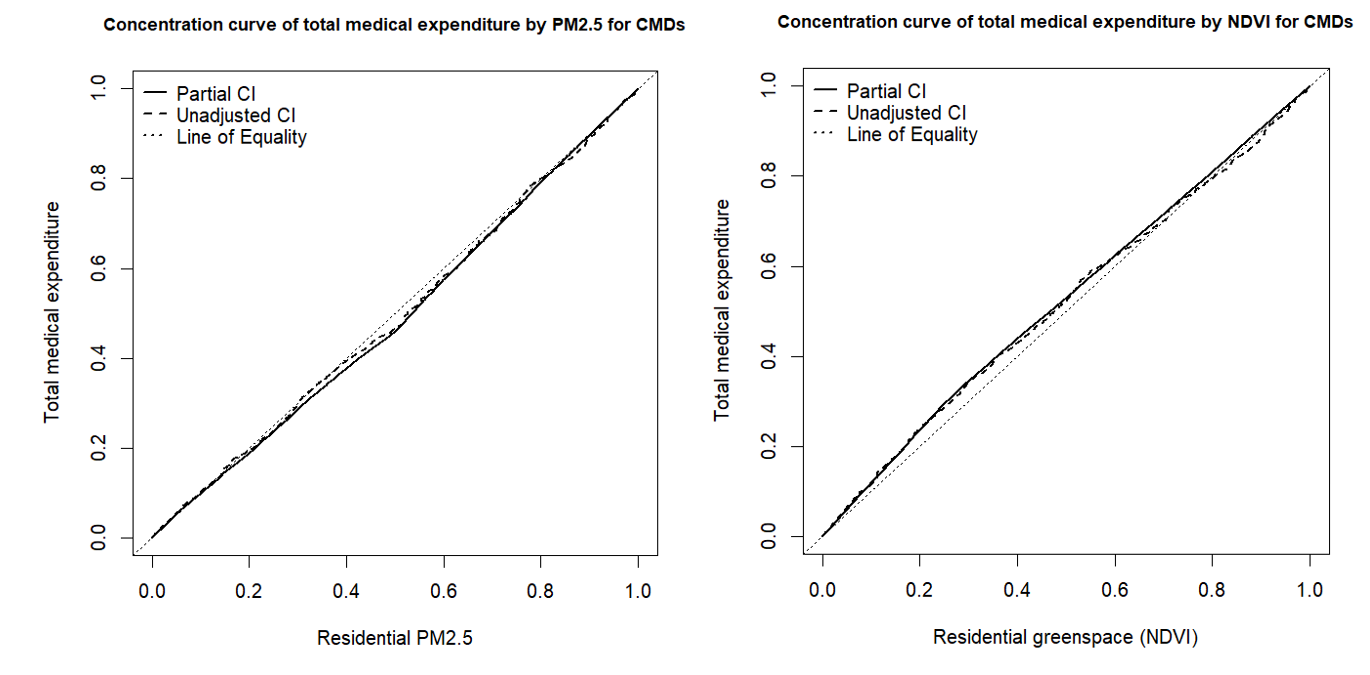


Figure 2. Concentration curve of annual household medical expenditure by residential greenspace and particulate matter exposure for cardiometabolic diseases


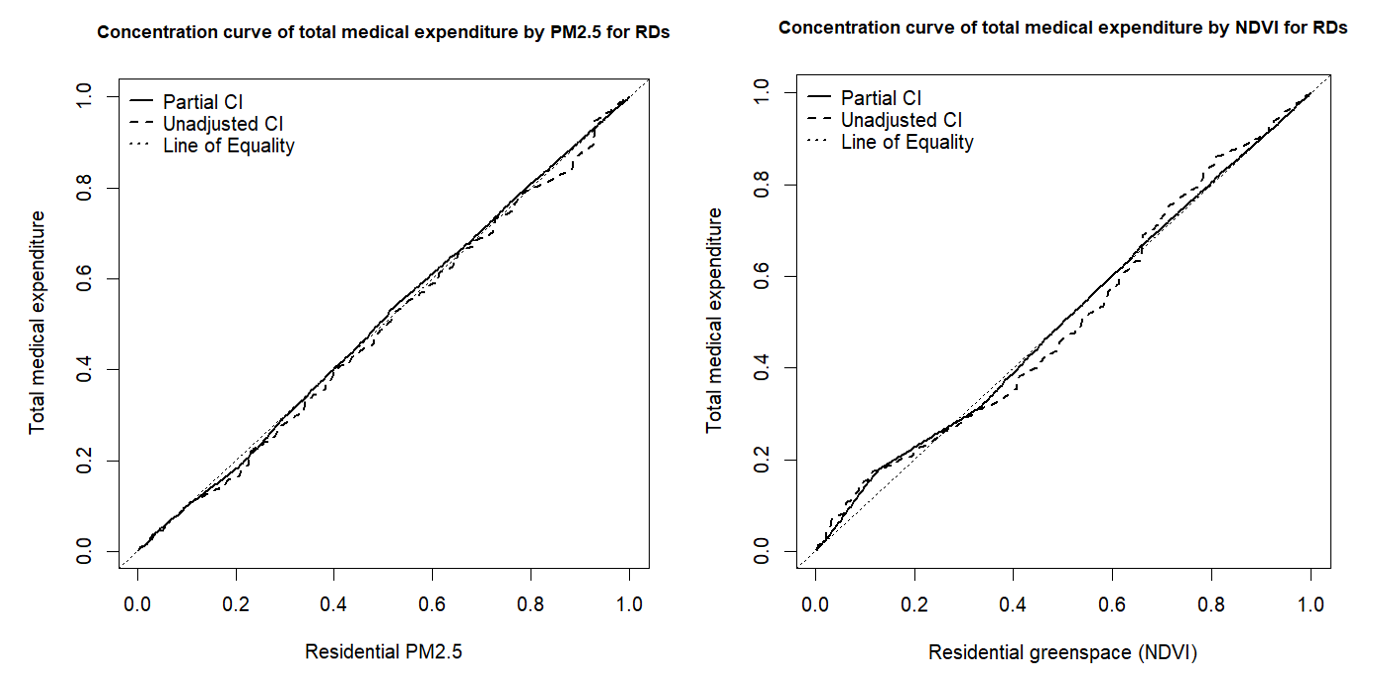


Figure 3. Concentration curve of annual household medical expenditure by residential greenspace and particulate matter exposure for chronic respiratory diseases


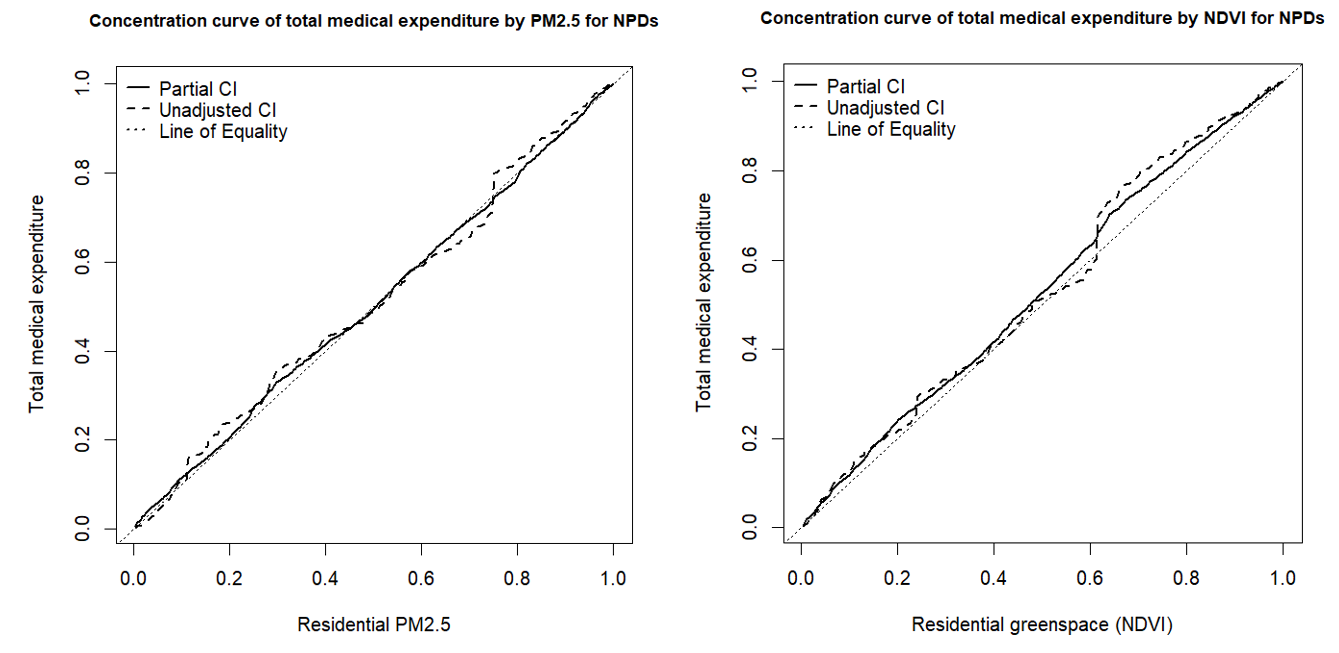


Figure 4. Concentration curve of annual household medical expenditure by residential greenspace and particulate matter exposure for neuropsychiatric disorders

References

1. Shandong Provincial Bureau of Statistics. Statistical Yearbook. Available from: <http://tjj.shandong.gov.cn/col/col6279/index.html>.

2. Shandong Provincial Government. Shandong Province ecological environment status report.
